# Supplementary material
Source: Research Square preprint supplement (doi:10.21203/rs.3.rs-9876253/v1)
Supplement: Supplementary file 1 [file b5f606ceb8094bd146662399.docx]

**Supplementary Material for Carciochi *et al.***

**Supplementary Table S1 ………………………………………………………………. 2**

**Supplementary Table S2 ………………………………………………………………. 4**

**Supplementary Table S3 ………………………………………………………………. 5**

**Supplementary Table S4 ………………………………………………………………. 6**

**Supplementary Table S5 ………………………………………………………………. 7**

**Supplementary Table S6 ………………………………………………………………. 8**

**Supplementary Equations ..……………………………………………………………. 9**

**Supplementary Figure S1 ..……………………………………………………………. 10**

**Additional references associated with Supplementary Material …….………….11**

***Supplementary Table S1.*** *Description of the 31 cropping systems included in the analysis. See* ***Extended Data Figs 1-2****.*

| Code | Production system | Area (M ha) a | Climate b | Water regime c | Current crop yields d  (t ha-1 crop-1) | Attainable crop yields e  (t ha-1 crop-1) |
| --- | --- | --- | --- | --- | --- | --- |
| LAWP | Western Pampas | 25.2 | Temperate | RF | 7.8 (Mz), 2.8 (Sb), 2.2 (Sf), 3.7 (WC) | 11.5 (Mz), 3.7 (Sb), 2.5 (Sf), 5.4 (WC) |
| LAEP | Eastern Pampas | 11.2 | Temperate | RF | 6.4 (Mz), 2.3 (Sb), 3.1 (WC) | 9.2 (Mz), 3.8 (Sb), 5.1 (WC) |
| LALR | Pampas Lowland Rice | 1.0 | Sub-tropical | IR | 8.5 (Rc) | 11.7 (Rc) |
| LACE | Brazilian Cerrado f | 34.7 | Tropical | RF | 6.7 (Mz), 4.0 (Sb) | 8.4 (Mz), 4.6 (Sb) |
| LAPA | Paraguay | 2.4 | Sub-tropical | RF | 4.9 (Mz), 2.7 (Sb) | 8.9 (Mz), 3.1 (Sb) |
| USWC | Western US Corn Belt | 17.3 | Temperate | IR & RF | 10.1 (Mz), 3.5 (Sb) | 11.1 (Mz), 4.0 (Sb) |
| USCC | Central US Corn Belt | 29.7 | Temperate | RF | 11.7 (Mz), 3.9 (Sb) | 11.8 (Mz), 4.2 (Sb) |
| USEC | Eastern US Corn Belt | 10.7 | Temperate | RF | 10.6 (Mz), 3.8 (Sb) | 12.3 (Mz), 4.2 (Sb) |
| USCO | US Cotton Belt | 2.4 | Temperate | IR & RF | 2.7 (Ct) | 3.5 (Ct) |
| SAIG | Indo-Gangetic Plain | 36.6 | Temperate | IR & RF | 4.9 (Mz), 3.9 (Rc), 2.0 (Wh) | 11.5 (Mz), 7.4 (Rc), 5.0 (Wh) |
| SAPA | Pakistan | 13.8 | Temperate | IR | 2.1 (Ct), 3.9 (R), 3.9 (W) | 2.7 (Ct), 7.4 (Rc), 5.1 (Wh) |
| SABA | Bangladesh | 12.3 | Tropical | IR | 2.2 (Ct), 6.1 (Mz), 22 (Pt), 1.5 (Rs), 4.8 (Rc), 3.9 (Wh) | 8.7 (Mz), 8.5 (Rc), 4.0 (Wh) |
| SAES | Eastern India | 5.5 | Tropical | RF | 3.8 (Rc) | 5.0 (Rc) |
| SACE | Central India | 24.6 | Arid | RF | 1.1 (Ct), 1.1 (Sb) | 2.0 (Ct), 1.2 (Sb) |
| CHNP | China North Plain | 24 | Temperate | IR & RF | 7.3 (Mz), 6.7 (Wh) | 9.7 (Mz), 7.6 (Wh) |
| CHNE | China Northeast | 22.5 | Temperate | IR & RF | 9.4 (Mz), 8.6 (Rc) | 10.6 (Mz), 8.6 (Rc) |
| CHNW | China Northwest | 15.2 | Arid | IR & RF | 8.3 (Mz), 5.1 (Wh) | 11.2 (Mz), 7.2 (Wh) |
| CHSW | China Southwest | 14.3 | Temperate | IR & RF | 5.8 (Mz), 6.0 (Rc) | 6.7 (Mz), 7.9 (Rc) |
| CHSE | China Southeast | 4.4 | Temperate | IR | 7.9 (Rc) | 7.9 (Rc) |
| CHYR | Yangtze River Valley | 22.2 | Temperate | IR | 1.8 (Rs), 7.8 (Rc), 5.0 (Wh) | 3.2 (Rs), 8.3 (Rc), 5.6 (Wh) |
| SEVM | Vietnam Mekong Delta | 4 | Tropical | IR | 7.7 (Rc) | 7.7 (Rc) |
| SEVR | Vietnam Red River Delta | 1 | Subtropical | IR | 5.7 (Rc) | 7.3 (Rc) |
| SEMY | Myanmar | 4.6 | Tropical | IR | 3.0 (Rc) | 7.6 (Rc) |
| SEPH | Philippines | 6.7 | Tropical | IR | 3.7 (Rc) | 7.6 (Rc) |
| SEID | Indonesia | 4.6 | Tropical | IR & RF | 5.2 (Rc) | 7.7 (Rc) |
| SECA | Cambodia | 4.9 | Tropical | IR | 5.4 (Rc) | 8.2 (Rc) |
| AFES | Eastern Africa | 9.1 | Tropical | RF | 2.8 (Mz) | 6.3 (Mz) |
| AFWE | Western Africa | 3 | Tropical | RF | 1.8 (Mz) | 9.6 (Mz) |
| AFSA | South Africa | 6 | Temperate | RF | 4.9 (Mz) | 7.4 (Mz) |
| AFUR | Africa Upland Rice | 2.2 | Tropical | RF | 1.4 (Rc) | 5.5 (Rc) |
| AFLR | Africa Lowland Rice | 4 | Tropical | IR & RF | 3.5 (Rc) | 7.9 (Rc) |

a Harvested area obtained from SPAM 1,2

b Obtained from Beck et al 3. based on Köppen-Geiger climate classification.

c IR: irrigated; RF: rainfed.

d Derived from field-level survey data compiled in the current study. Cotton (Ct), maize (Mz), potatoes (Pt), rice (Rc), rapeseed (Rs), soybean (Sb), sunflower (Sf), WC: winter cereal (wheat (Wh) and/or barley). All rice is grown in lowland environments, except for upland rice in AFUR.

e Calculated as 80% of yield potential. Obtained from the Yield Potential and Yield Gap Atlas 4 or, if not available, from the literature5–8.

f In our study, the Brazilian Cerrado region also included portions of the Atlantic Forest region where maize and soybean are also grown.

***Supplementary Table S2.*** *Residue management and potassium (K) fertilizer application on the 31 cropping systems. See* ***Extended Data Figs 1-2****.*

| Code | Residue removal (%) a | Residue burning (%) a | Fertilizer K |
| --- | --- | --- | --- |
| (kg ha-1 y-1) b |
| LAWP | 4 | 2 | 0 |
| LAEP | 7 | 0 | 72 |
| LALR | 8 | 1 | 60 |
| LACE | 8 | 0 | 142 |
| LAPA | 2 | 0 | 65 |
| USWC | 13 | 0 | 11 |
| USCC | 12 | 0 | 50 |
| USEC | 11 | 0 | 66 |
| USCO | 4 | 0 | 27 |
| SAIG | 71 | 10 | 37 |
| SAPA | 61 | 15 | 11 |
| SABA | 64 | 10 | 46 |
| SAES | 63 | 13 | 74 |
| SACE | 62 | 7 | 8 |
| CHNP | 33 | 10 | 166 |
| CHNE | 59 | 13 | 92 |
| CHNW | 71 | 11 | 49 |
| CHSW | 67 | 14 | 112 |
| CHSE | 43 | 15 | 236 |
| CHYR | 49 | 13 | 159 |
| SEVM | 43 | 38 | 113 |
| SEVR | 44 | 40 | 99 |
| SEMY | 47 | 21 | 25 |
| SEPH | 37 | 17 | 39 |
| SEID | 28 | 30 | 61 |
| SECA | 45 | 30 | 11 |
| AFES | 70 | 8 | 0 |
| AFWE | 33 | 8 | 12 |
| AFSA | 67 | 18 | 8 |
| AFUR | 47 | 11 | 3 |
| AFLR | 92 | 2 | 4 |

a Based on field-level survey data (current study) and Aramburu-Merlos et al. 9

b Based on survey data compiled in the current study.

***Supplementary Table S3.*** *Number of observations for the variables analyzed.**Soil exchangeable potassium (K) concentration, yield of crops that did not receive K fertilizer, relative to K-fertilized crops (RY), net profit increase (NPI), and K balance. For calculation of the K balance, only observations that included at least K fertilizer rate and crop yield were considered, while other balance components might have been retrieved from other sources (see* ***Supplementary Table S4)****.*

| System | Soil K | RY and NPI | K balance |
| --- | --- | --- | --- |
| LAWP | 7603 | 67 | 5465 |
| LAEP | 204343 | 251 | 20958 |
| LALR | 709 | 39 | 2819 |
| LACE | 311447 | 38 | 508 |
| LAPA | 654 | 32 | 708 |
| USWC | 3188654 | 116 | 3589 |
| USCC | 8100196 | 309 | 2794 |
| USEC | 4347268 | 97 | 1941 |
| USCO | 5633734 | 147 | OS a |
| SAIG | 3511 | 1091 | 18605 |
| SAPA | 47976 | 120 | 8120 |
| SABA | 306 | 666 | 7097 |
| SAES | 2737 | 259 | 6064 |
| SACE | 168 | 227 | OS a |
| CHNP | 65744 | 16985 | 1388 |
| CHNE | 208937 | 9932 | 378 |
| CHNW | 86785 | 11395 | 247 |
| CHSW | 6275 | 7453 | 110 |
| CHSE | 22594 | 2757 | 192 |
| CHYR | 8819 | 10795 | 1553 |
| SEVM | 147 | 43 | 4896 |
| SEVR | 279 | 60 | OS a |
| SEMY | 1461 | 21 | 3766 |
| SEPH | 9891 | 281 | 3125 |
| SEID | 97 | 280 | 2256 |
| SECA | 153 | 6 | 5433 |
| AFES | 15539 | 1344 | 14588 |
| AFWE | 6594 | 370 | 115 |
| AFSA | 2060 | 15 | OS a |
| AFUR | 3705 | 188 | 260 |
| AFLR | 978 | 940 | 765 |

a OS: average values derived from official national statistics.

***Supplementary Table S4.*** *Tiers used in the parameters of the partial K balance (Eqs. 2 to 4; Supplementary Equations) in each cropping system*.

| System | - - - - - - - - - - - - - - - - - Inputs - - - - - - - - - - - - - - - - - | | | | | | | | - - - - - - - - - - Outputs - - - - - - - - - - | | | | | |
| --- | --- | --- | --- | --- | --- | --- | --- | --- | --- | --- | --- | --- | --- | --- |
| KFE a | | KOS | | KIR | | KSE | | KHP | | KRR | | KRB | |
| Tier b | Source | Tier | Source | Tier | Source | Tier | Source | Tier | Source | Tier | Source | Tier | Source |
| LAWP | 1 | - | 2 | 10 | 2 | 11 | 3 | 12 | 1 & 3 | 12 | 2 & 3 | 9,12 | 2 & 3 | 9,12 |
| LAEP | 1 | - | 2 | 10 | 1 &3 | 13–16 | 3 | 12 | 1 & 3 | 12 | 2 & 3 | 9,12 | 2 & 3 | 9,12 |
| LALR | 1 | - | 2 | 10 | 1, 2 &3 | 13–17 | 3 | 12 | 1 & 3 | 12 | 2 & 3 | 9,12 | 2 & 3 | 9,12 |
| LACE | 1 | - | 1 & 3 | 18–23 | 1, 2 &3 | 13–16,24 | 3 | 12 | 1 & 3 | 12 | 2 & 3 | 9,12 | 1, 2 &3 | 9,12 |
| LAPA | 1 | - | 1 | - | 1 | - | 3 | 12 | 1 & 3 | 12 | 1, 2 &3 | 9,12 | 1, 2 &3 | 9,12 |
| USWC | 1 &2 | 25 | 1 & 2 | 26 | 1 & 2 | 27 | 3 | 12 | 1, 2 &3 | 12,28 | 1, 2 &3 | 9,12,29 | 1, 2 &3 | 9,12 |
| USCC | 1 &2 | 25 | 1 & 2 | 26 | 1 | - | 3 | 12 | 1, 2 &3 | 12,282 | 1, 2 &3 | 9,12,29 | 1, 2 &3 | 9,12 |
| USEC | 1 &2 | 25 | 1 & 2 | 26 | 1 | - | 3 | 12 | 1, 2 &3 | 12,282 | 1, 2 &3 | 9,12,29 | 1, 2 &3 | 9,12 |
| USCO | 2 | 25 | 2 | 10 | 2 | 30 | 3 | 12 | 2 & 3 | 12,28 | 2 & 3 | 9,12 | 2 & 3 | 9,12 |
| SAIG | 1 | - | 1 & 3 | 18–23 | 1 & 2 | 13 | 3 | 12 | 1 & 3 | 12 | 1, 2 &3 | 9,12 | 1, 2 &3 | 9,12 |
| SAPA | 1 | - | 1 & 3 | 18–23 | 1 & 2 | 13 | 3 | 12 | 1 & 3 | 12 | 1, 2 &3 | 9,12 | 1, 2 &3 | 9,12 |
| SABA | 1 | - | 1 & 3 | 18–23 | 1 & 2 | 13 | 3 | 12 | 1 & 3 | 12 | 1, 2 &3 | 9,12 | 1, 2 &3 | 9,12 |
| SAES | 1 | - | 1 & 3 | 18–23 | 1 & 2 | 13 | 3 | 12 | 1 & 3 | 12 | 1, 2 &3 | 9,12 | 1, 2 &3 | 9,12 |
| SACE | 2 | 31 | 1 & 3 | 18–23 | 1 & 2 | 13 | 3 | 12 | 1 & 3 | 12 | 1, 2 &3 | 9,12 | 1, 2 &3 | 9,12 |
| CHNP | 1 | - | 1 & 3 | 18–23 | 1 & 2 | 13,16 | 3 | 12 | 1 & 3 | 12 | 1, 2 & 3 | 9,12 | 1, 2 &3 | 9,12 |
| CHNE | 1 | - | 1 & 3 | 18–23 | 1 & 2 | 13,16 | 3 | 12 | 1 & 3 | 12 | 1, 2 & 3 | 9,12 | 1, 2 &3 | 9,12 |
| CHNW | 1 | - | 1 & 3 | 18–23 | 1 & 2 | 13,16 | 3 | 12 | 1 & 3 | 12 | 1, 2 & 3 | 9,12 | 1, 2 &3 | 9,12 |
| CHSW | 1 | - | 1 & 3 | 18–23 | 1 & 2 | 13,16 | 3 | 12 | 1 & 3 | 12 | 1, 2 & 3 | 9,12 | 1, 2 &3 | 9,12 |
| CHSE | 1 | - | 1 & 3 | 18–23 | 1 & 2 | 13,16 | 3 | 12 | 1 & 3 | 12 | 1, 2 & 3 | 9,12 | 1, 2 &3 | 9,12 |
| CHYR | 1 | - | 1 & 3 | 18–23 | 1 & 2 | 13,16 | 3 | 12 | 1 & 3 | 12 | 1, 2 & 3 | 9,12 | 1, 2 &3 | 9,12 |
| SEVM | 1 | - | 2 | 10 | 1 & 2 | 15 | 3 | 12 | 1 & 3 | 12 | 1, 2 & 3 | 9,12 | 1, 2 &3 | 9,12 |
| SEVR | 2 | 31 | 2 | 10 | 2 | 13 | 3 | 12 | 2 & 3 | 4,12 | 2 & 3 | 9,12 | 2 &3 | 9,12 |
| SEMY | 1 | - | 2 | 10 | 1 & 2 | 13 | 3 | 12 | 1 & 3 | 12 | 1, 2 & 3 | 9,12 | 1, 2 &3 | 9,12 |
| SEPH | 1 | - | 2 | 10 | 1 & 2 | 13 | 3 | 12 | 1 & 3 | 12 | 1, 2 & 3 | 9,12 | 1, 2 &3 | 9,12 |
| SEID | 1 | - | 2 | 10 | 1 & 2 | 13 | 3 | 12 | 1 & 3 | 12 | 1, 2 & 3 | 9,12 | 1, 2 &3 | 9,12 |
| SECA | 1 | - | 1 & 3 | 18–23 | 1 & 2 | 13 | 3 | 12 | 1 & 3 | 12 | 1, 2 & 3 | 9,12 | 1, 2 &3 | 9,12 |
| AFES | 1 | - | 2 | 10 | 1 | - | 3 | 12 | 1 & 3 | 12 | 1, 2 & 3 | 9,12 | 1, 2 &3 | 9,12 |
| AFWE | 1 | - | 2 | 10 | 1 | - | 3 | 12 | 1 & 3 | 12 | 1, 2 & 3 | 9,12 | 1, 2 &3 | 9,12 |
| AFSA | 2 | 31 | 2 | 10 | 1 | - | 3 | 12 | 2 & 3 | 12,23 | 2 & 3 | 9,12 | 2 &3 | 9,12 |
| AFUR | 1 | - | 2 | 10 | 1 | - | 3 | 12 | 1 & 3 | 12 | 1, 2 & 3 | 9,12 | 1, 2 &3 | 9,12 |
| AFLR | 1 | - | 2 | 10 | 1 & 2 | 13,16 | 3 | 12 | 1 & 3 | 12 | 1, 2 & 3 | 9,12 | 1, 2 &3 | 9,12 |

aK from inorganic fertilizer (KFE), organic sources (KOS), irrigation water (KIR), planted seed (KSE), harvested product (KHP) and residue removal (KRR) and burning (KRB).

b Tier 1: field-level data; tier 2: regional or national data; tier 3: global data.

***Supplementary Table S5.*** *Global reference values (Tier 3) for specific parameters used to calculate potassium (K) balances* ***(Supplementary Equations S1-S9).***

| K balance component | Parameter | Unit | Crop | Value | Source |
| --- | --- | --- | --- | --- | --- |
| KOS | OS K conc. | % |  | 0.70 (0.2 – 2.25) | 18–23 |
| KSE | SE K conc. | % | All | same as HP K conc. |  |
| KHP | HP K conc. | % | Maize | 0.35 | 12 |
| KHP | HP K conc. | % | Soybean | 1.53 | 12 |
| KHP | HP K conc. | % | Wheat | 0.40 | 12 |
| KHP | HP K conc. | % | Rice | 0.38 | 12 |
| KHP | HP K conc. | % | Cotton | 0.84 | 12 |
| KHP | HP K conc. | % | Rapeseed | 1.23 | 12 |
| KRR | KHI | unitless | Maize | 0.20 | 12 |
| KRR | KHI | unitless | Soybean | 0.38 | 12 |
| KRR | KHI | unitless | Wheat | 0.18 | 12 |
| KRR | KHI | unitless | Rice | 0.17 | 12 |
| KRR | KHI | unitless | Cotton | 0.22 | 12 |
| KRR | KHI | unitless | Rapeseed | 0.19 | 12 |
| KRR | R K conc. | % | Maize | 1.56 | 12 |
| KRR | R K conc. | % | Soybean | 1.34 | 12 |
| KRR | R K conc. | % | Wheat | 1.87 | 12 |
| KRR | R K conc. | % | Rice | 2.12 | 12 |

KOS: K input in organic sources. OS K conc: K concentration in organic sources. KSE: K input in planted seed. SE K conc: K concentration in planted seed. KHP: K removed in harvested product. HP K conc: K concentration in harvested products. KRR: K removal through residue management. KHI: K harvest index. R K conc: K concentration in crop residue.

***Supplementary Table S6.*** *Explanatory variables (soil, climate, and management) of the relative yield of crops that did not receive K fertilizer, relative to K-fertilized crops.*

| Abbreviation | Variable | Unit | Source |
| --- | --- | --- | --- |
| RY | Relative yield | % | This study |
| Soil_K | Soil exchangeable K concentration | mg kg-1 | This study |
| Sand | Sand content | % | SoilGrids32 |
| Clay | Clay content | % | SoilGrids32 |
| Smectite | Smectite content | % | Ito and Wagai33 |
| Illite | Illite content | % | Ito and Wagai33 |
| Vermiculite | Vermiculite content | % | Ito and Wagai33 |
| K_Fert_hist | Historical inorganic K fertilizer application | kg K ha-1 y-1 | Ludemann et al.34 |
| K_Rem_Res_hist | Historical K removal with crop residues | kg K ha-1 y-1 | Ludemann et al.34 |
| K_Balance_hist | Historical K balance | kg K ha-1 y-1 | Ludemann et al.34 |
| Abs_Lat | Absolute mean latitude | degrees (°) | SPAM1,2 |
| Arid_Indx | Aridity index | (dimensionless) | WorldClim35 |
| CI | Cropping intensity | crops y-1 | USDA28 - GYGA4 |
| Ag_History | Agricultural history | years | Hurtt et al.36 |

**Supplementary Equations**. Equations used for estimation of the components of the K balance *(Eqs. 2 to 4)*

*Inputs:*

KFE (kg K ha⁻¹) = IF qty. (kg ha⁻¹) × IF K conc. (%) / 100 (Eq. S1)
where KFE is K input from inorganic fertilizer, IF qty. is the amount of inorganic fertilizer applied, and IF K conc. is the K concentration in the fertilizer.

KOS (kg K ha⁻¹) = OS qty. (kg ha⁻¹) × OS K conc. (%) / 100 (Eq. S2)
where KOS is K input from organic sources, OS qty. is the amount of organic material applied, and OS K conc. is its K concentration.

KIR (kg K ha⁻¹) = IR qty. (mm) × IR water K conc. (mg L⁻¹) / 100 (Eq. S3)
where KIR is K input from irrigation water, IR qty. is the irrigation amount, and IR water K conc. is the K concentration in irrigation water.

KSE (kg K ha⁻¹) = SE qty. (kg ha⁻¹) × SE K conc. (%) / 100 (Eq. S4)
where KSE is K input from seed, SE qty. is the seeding rate, and SE K conc. is the K concentration in seed.

*Outputs:*

KHP (kg K ha⁻¹) = HP qty. (kg ha⁻¹) × HP K conc. (%) / 100 (Eq. S5)
where KHP is K removed in harvested product, HP qty. is the harvested yield, and HP K conc. is the K concentration in the harvested product.

KRR (kg K ha⁻¹) = R qty. (kg ha⁻¹) × R K conc. (%) / 100 × RR (%) / 100 (Eq. S6)
where KRR is K removed through residue removal, R qty. is the residue biomass, R K conc. is the K concentration in residues, and RR is the fraction of residues removed.

Alternatively:
KRR (kg K ha⁻¹) = ((Kharvest / KHI) − Kharvest) × RR (%) / 100 (Eq. S7)
where Kharvest is K accumulation in harvested product and KHI is the K harvest index.

KRB (kg K ha⁻¹) = R qty. (kg ha⁻¹) × R K conc. (%) / 100 × RB (%) / 100 × 0.26 (Eq. S8)
where KRB is K loss due to residue burning, RB is the fraction of residues burned, and 0.26 represents the fraction of K lost during burning37–42.

Alternatively:
KRB (kg K ha⁻¹) = ((Kharvest / KHI) − Kharvest) × RB (%) / 100 × 0.26 (Eq. S9)
where Kharvest is K accumulation in harvested product and KHI is the K harvest index.


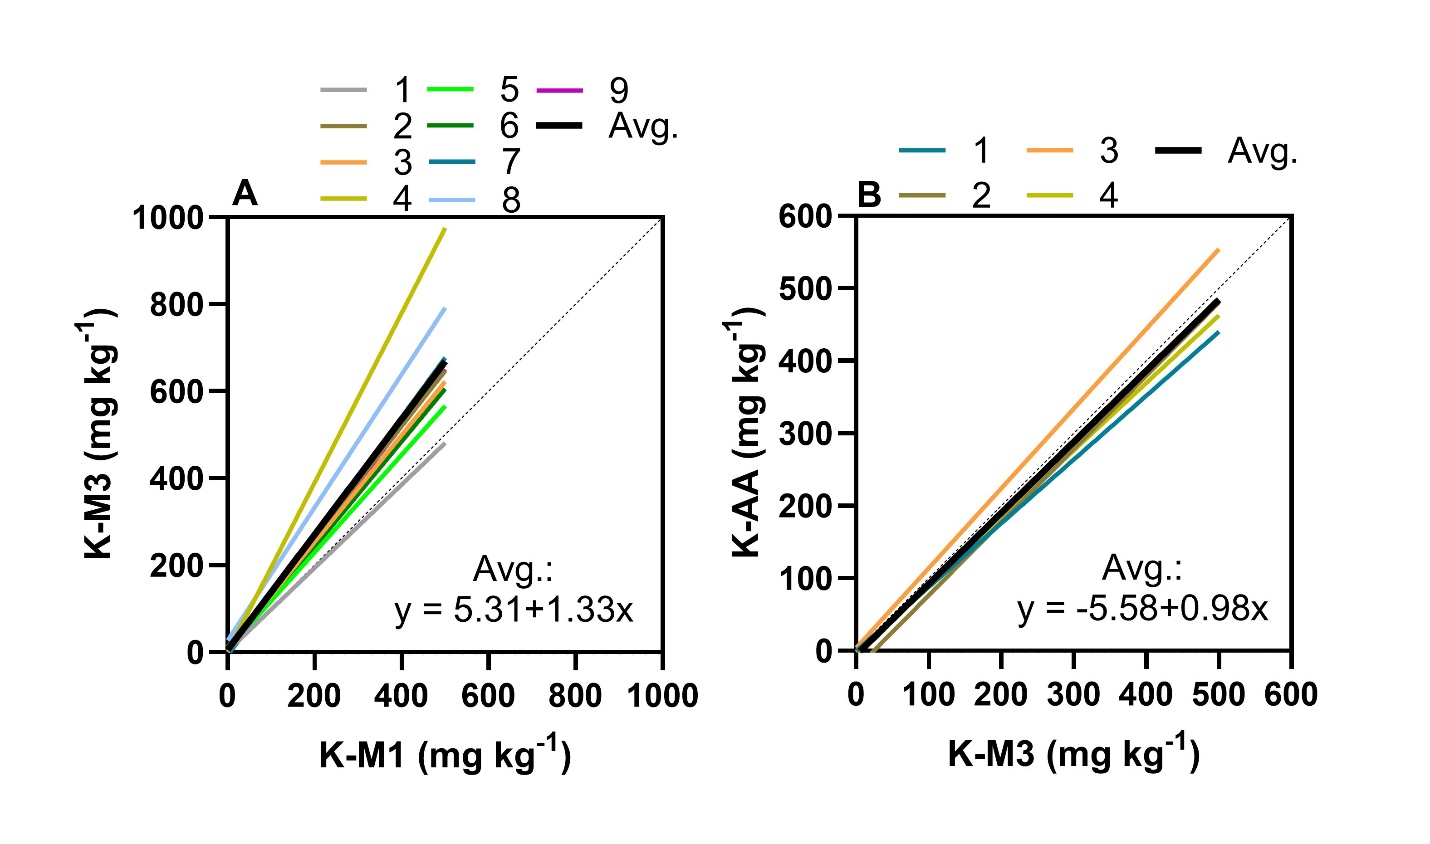


***Supplementary Figure S1. Linear regression models used to adjust reported soil K concentrations.*** *Equations to convert soil exchangeable K concentrations extracted with (A) Mehlich-1 (K-M1) to Mehlich-3 (K-M3), and (B) from K-M3 to ammonium acetate 1N (K-AA). Models in A: 1, SERA-IEG*43 *Florida; 2, SERA-IEG*43 *Kentucky; 3, SERA-IEG*43 *South Carolina; 4, SERA-IEG*43 *NAPT; 5, SERA-IEG*43 *Dalaware1; 6, SERA-IEG*43 *Dalaware2; 7, SERA-IEG*43 *Dalaware3; 8, Adotey et al.*44 *; 9, Bortolon et al.*45*. Models in B: 1, Culman et al.*46*; 2, Rutter et al.*47*; 3, Ferrando et al.*48*; 4, Vocasek*49*. In both panels, the average model is shown in black and associated equation is shown.*

**Additional references associated with Supplementary Material**

1. International Food Policy Research Institute (IFPRI). Global Spatially-Disaggregated Crop Production Statistics Data for 2010 Version 2.0. Harvard Dataverse https://doi.org/10.7910/DVN/PRFF8V (2019).

2. International Food Policy Research Institute (IFPRI). Spatially-Disaggregated Crop Production Statistics Data in Africa South of the Sahara for 2017. Harvard Dataverse https://doi.org/10.7910/DVN/FSSKBW (2020).

3. Beck, H. E. *et al.* High-resolution (1 km) Köppen-Geiger maps for 1901–2099 based on constrained CMIP6 projections. *Sci Data* **10**, 724 (2023).

4. YPYGA. Yield Potential & Yield Gap Atlas. (2026). [www.yieldgap.com](http://www.yieldgap.com)

5. Constable, G. A. & Bange, M. P. The yield potential of cotton (Gossypium hirsutum L.). *Field Crops Research* **182**, 98–106 (2015).

6. Singh, J. *et al.* 65 years of cotton lint yield progress in the USA: Uncovering key influential yield components. *Field Crops Research* **302**, 109058 (2023).

7. Khan, A. & Ansari, S. A. Efficiency in Cotton Production Across the States in India. *BKAP* https://doi.org/10.18805/BKAP624 (2023) doi:10.18805/BKAP624.

8. Nargund, R. *et al.* Assessing Soybean Yield Potential and Yield Gap in Different Agroecological Regions of India Using the DSSAT Model. *Agronomy* **14**, 1929 (2024).

9. Aramburu-Merlos, F. *et al.* Global dataset on nutrient removal with crop residues. Dryad https://doi.org/10.5061/dryad.mgqnk99d1 (2025).

10. FAOSTAT. https://www.fao.org/faostat/en/#data.

11. Chambouleyron, J. & Morábito, J. A. *EL Riego En Argentina*. https://www.ina.gov.ar/archivos/publicaciones/INA-Cra-El_riego_en_Argentina.pdf.

12. Carciochi, W. D. *et al.* Quantifying potassium requirement and removal across crop species. *Field Crops Research* **322**, 109717 (2025).

13. Buresh, R. J., Pampolino, M. F. & Witt, C. Field-specific potassium and phosphorus balances and fertilizer requirements for irrigated rice-based cropping systems. *Plant Soil* **335**, 35–64 (2010).

14. Regmi, A. P. *et al.* Yield and Soil Fertility Trends in a 20‐Year Rice–Rice–Wheat Experiment in Nepal. *Soil Science Soc of Amer J* **66**, 857–867 (2002).

15. Hoa, N., Janssen, B., Oenema, O. & Dobermann, A. Comparison of partial and complete soil K budgets under intensive rice cropping in the Mekong Delta, Vietnam. *Agriculture, Ecosystems & Environment* **116**, 121–131 (2006).

16. Gao, Z. *et al.* Dynamics of potassium concentration in paddy field water, soil and plant affected by potassium fertilizer levels. *Nutr Cycl Agroecosyst* https://doi.org/10.1007/s10705-025-10396-7 (2025) doi:10.1007/s10705-025-10396-7.

17. Carracelas, G., Hornbuckle, J., Rosas, J. & Roel, A. Irrigation management strategies to increase water productivity in Oryza sativa (rice) in Uruguay. *Agricultural Water Management* **222**, 161–172 (2019).

18. Sileshi, G. W., Nhamo, N., Mafongoya, P. L. & Tanimu, J. Stoichiometry of animal manure and implications for nutrient cycling and agriculture in sub-Saharan Africa. *Nutr Cycl Agroecosyst* **107**, 91–105 (2017).

19. Haque, M. M., Biswas, J. C., Islam, M. R., Islam, A. & Kabir, M. S. Effect of long-term chemical and organic fertilization on rice productivity, nutrient use-efficiency, and balance under a rice-fallow-rice system. *Journal of Plant Nutrition* **42**, 2901–2914 (2019).

20. Thwe, H. M., Kristiansen, P. & Herridge, D. F. Benchmarks for improved productivity and profitability of monsoon rice in lower Myanmar. *Field Crops Research* **233**, 59–69 (2019).

21. Mikkelsen, R. & Roberts, T. Inputs: Potassium Sources for Agricultural Systems. in 47–73 (2021). doi:10.1007/978-3-030-59197-7_2.

22. ManureDB. https://manuredb.umn.edu/.

23. FAOSTAT. https://www.fao.org/faostat/en/#data/ESB.

24. Multsch, S. *et al.* Assessment of potential implications of agricultural irrigation policy on surface water scarcity in Brazil. *Hydrology and Earth System Sciences* **24**, 307–324 (2020).

25. Data Products | Economic Research Service. https://www.ers.usda.gov/data-products.

26. USDA/NASS QuickStats Ad-hoc Query Tool. https://quickstats.nass.usda.gov/.

27. Wortmann, C. Irrigation Well Water in Nebraska. *Nebraska Extension* 1–27 (2021).

28. FAS-USDA. Foreign Agricultural Service - U.S. Department of Agriculture - Data and Analysis. https://www.fas.usda.gov/data (2026).

29. Schmer, M. R., Brown, R. M., Jin, V. L., Mitchell, R. B. & Redfearn, D. D. Corn Residue Use by Livestock in the United States. *Agricultural &amp; Env Letters* **2**, 160043 (2017).

30. Perry, C. & Barnes, E. Cotton Irrigation Management for Humid Regions. (2012).

31. IFASTAT. *Fertilizer* https://www.fertilizer.org/market-intelligence/ifastat/.

32. Poggio, L. *et al.* SoilGrids 2.0: producing soil information for the globe with quantified spatial uncertainty. *SOIL* **7**, 217–240 (2021).

33. Ito, A. & Wagai, R. Global distribution of clay-size minerals on land surface for biogeochemical and climatological studies. *Sci Data* **4**, 170103 (2017).

34. Ludemann, C. I. *et al.* *A Global Reference Database in FAOSTAT of Cropland Nutrient Budgets and Nutrient Use Efficiency: Nitrogen, Phosphorus and Potassium, 1961–2020*. https://essd.copernicus.org/preprints/essd-2023-206/ (2023) doi:10.5194/essd-2023-206.

35. Fick, S. E. & Hijmans, R. J. WorldClim 2: new 1‐km spatial resolution climate surfaces for global land areas. *Intl Journal of Climatology* **37**, 4302–4315 (2017).

36. Hurtt, G. C. *et al.* Harmonization of global land use change and management for the period 850–2100 (LUH2) for CMIP6. *Geosci. Model Dev.* **13**, 5425–5464 (2020).

37. Dobermann, A., Ed, Witt, C., Ed & Dawe, D., Ed. *Increasing Productivity of Intensive Rice Systems through Site-Specific Nutrient Management*. (International Rice Research Institute, Philippines, 2004).

38. Heard, J., Cavers, C. & Adrian, G. Up in smoke - nutrient loss with straw burning. *Better Crops* **90**, 10–11 (2006).

39. Singh, R. P., Dhaliwal, H. S., Humphreys, E., Sidhu, H. S. & Blackwell, J. Economic assessment of the Happy Seeder for rice-wheat systems in Punjab, India. in 1–29 (Canberra, Australia, 2008).

40. Sharma, P. & Mishra, B. Effect of burning rice and wheat crop residues: Loss of N, P, K, and S from soil and changes in the nutrient availability. *Journal of the Indian Society of Soil Science* **49**, 425–429 (2001).

41. Dobermann, A. & Fairhurst, T. *Rice: Nutrient Disorders & Nutrient Management*. (Potash & Phosphate Institute [u.a.], Signapore, 2000).

42. Robinson, D. W. & Kirkby, C. A. *Maize Stubble Management Survey: Summary of Results*. (2002).

43. Southern Regional Fact Sheet. *Conversion Equations for Soil Test Extractants: Mehlich-1 and Mehlich-3*. 12 https://aesl.ces.uga.edu/sera6/FACT/SERA-6-FS-5.pdf (2005).

44. Adotey, N. *et al.* *Converting between Mehlich 1 and 3 Soil Test Values for West Tennessee Soils*. https://utcrops.com/soil/soil-fertility/soil-testing/ (2024).

45. Bortolon, L., Gianello, C., Welter, S., Almeida, R. G. O. & Giasson, E. Simultaneous Extraction of Phosphorus, Potassium, Calcium and Magnesium from Soils and Potassium Recommendations for Crops in Southern Brazil. *Pedosphere* **21**, 365–372 (2011).

46. Culman, S. W. *et al.* Calibration of Mehlich-3 with Bray P1 and Ammonium Acetate in the Tri-State Region of Ohio, Indiana and Michigan. *Communications in Soil Science and Plant Analysis* **51**, 86–97 (2020).

47. Rutter, E. B., Ruiz Diaz, D. & Hargrave, L. M. Evaluation of Mehlich‐3 for determination of cation exchange capacity in Kansas soils. *Soil Science Soc of Amer J* **86**, 146–156 (2022).

48. Ferrando, M. G., Barbazán, M. M., García, F. O. & Mallarino, A. P. Comparison of the ammonium acetate, Mehlich 3, and sodium tetraphenylboron as extractants to evaluate crop available potassium. *Communications in Soil Science and Plant Analysis* **51**, 997–1005 (2020).

49. Vocasek, F. Correlation of the Mehlich-3 extraction with other soil test methods on High Plains soils: 2. potassium, calcium, magnesium, sodium, and sulfur. (1997).
